# Supplementary material for: Dietary Nitrate Intake Is Associated with Decreased Incidence of Open-Angle Glaucoma: The Rotterdam Study
Source: MDPI journal article supplement (doi:10.3390/nu14122490), 2022-06-15
Supplement: s1 [file nutrients-1760125-supplementary.pdf › nutrients-1760125-supplementary.pdf]

## Article

# Dietary Nitrate Intake is Associated with Decreased Incidence of Open-Angle Glaucoma: The Rotterdam Study

Joëlle E. Vergroesen <sup>1,2</sup>, Tosca O.E. de Crom <sup>2</sup>, Lauren C. Blekkenhorst <sup>3</sup>, Caroline C.W. Klaver <sup>1,2,4,5</sup>, Trudy Voortman <sup>2,6</sup> and Wishal D. Ramdas <sup>1,\*</sup>

## Content

- **Figure S1.** Multivariable-adjusted odds ratios with corresponding 95% confidence intervals (CIs) for incident open-angle glaucoma per 10 gram/day increase in total dietary nitrate intake (A), nitrate intake from vegetables (B), and nitrate intake from non-vegetable food sources (C), shown per cumulative follow-up interval.
- **Table S1.** Multivariable adjusted beta (95% confidence interval) of diastolic blood pressure, by quintiles of nitrate intake.
- **Table S2.** Multivariable adjusted beta (95% confidence interval) of systolic blood pressure, by quintiles of nitrate intake.
- **Table S3.** Multivariable adjusted odds ratio (95% confidence interval) of hypertension, by quintiles of nitrate intake.
- **Figure S2.** Beneficial health effects of dietary nitrate.
- **Table S4.** Multivariable adjusted odds ratio (95% confidence interval) of incident open-angle glaucoma by nitrate intake.
- **Table S5.** Multivariable adjusted beta (95% confidence interval) of intraocular pressure by nitrate intake.

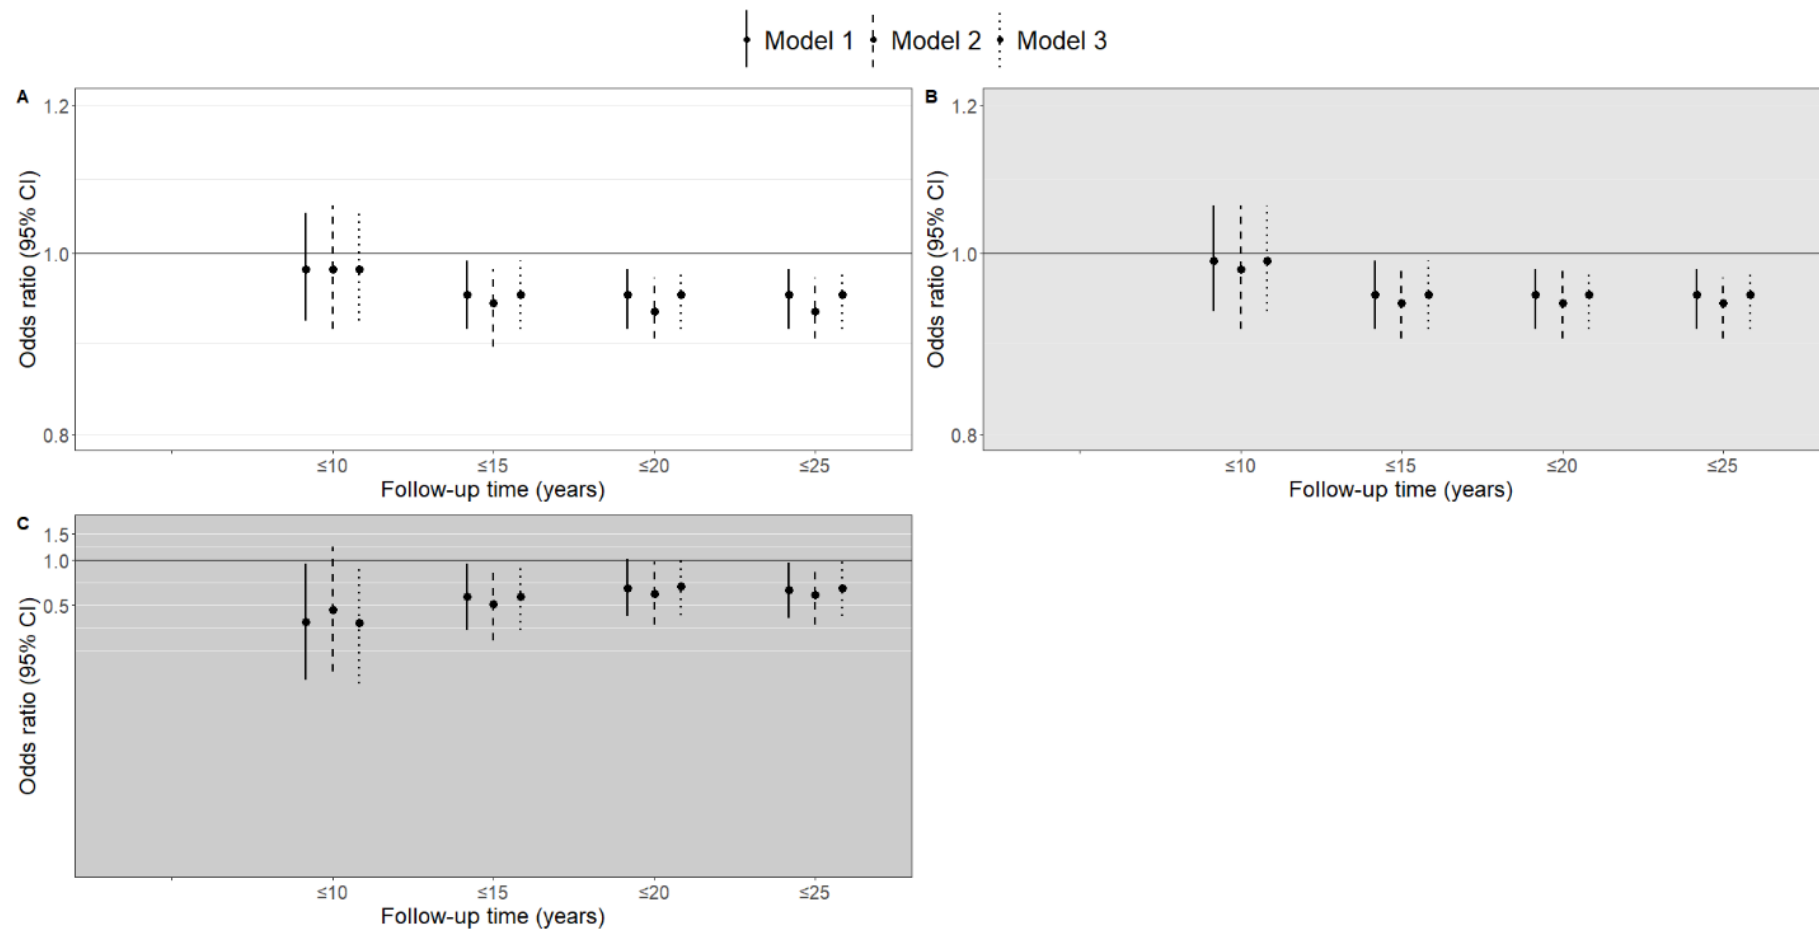

**Figure S1.** Multivariable-adjusted odds ratios with corresponding 95% confidence intervals (CIs) for incident open-angle glaucoma per 10 gram/day increase in total dietary nitrate intake (A), nitrate intake from vegetables (B), and nitrate intake from non-vegetable food sources (C), shown per cumulative follow-up interval. Model 1: adjusted for body mass index, total energy intake, diet quality, physical activity, and follow-up time. Model 2: model 1 additionally adjusted for intraocular pressure. Model 3: model 1 additionally adjusted for education level and smoking status.

**Table S1.** Multivariable adjusted beta (95% confidence interval) of diastolic blood pressure, by quintiles of nitrate intake.

|                                                                  |         | <b>Beta<sup>a</sup> per 1 unit<br/>increase in nitrate<br/>intake</b> | <b>P-value</b> | <b>Q1</b> | <b>Q2</b>            | <b>Q3</b>            | <b>Q4</b>          | <b>Q5</b>          | <b>P-trend<sup>b</sup></b> |
|------------------------------------------------------------------|---------|-----------------------------------------------------------------------|----------------|-----------|----------------------|----------------------|--------------------|--------------------|----------------------------|
| Total dietary nitrate intake<br>(10 mg/day)                      | Model 1 | 0.03 (−0.07–0.13)                                                     | 0.54           | 0.00      | −2.28 (−4.60–0.04)   | −0.43 (−2.94–2.09)   | −1.51 (−3.90–0.89) | −0.54 (−2.87–1.79) | 0.52                       |
|                                                                  | Model 2 | 0.02 (−0.08–0.12)                                                     | 0.69           | 0.00      | −2.40 (−4.73– −0.07) | −0.48 (−3.02–2.07)   | −1.35 (−3.75–1.05) | −0.94 (−3.30–1.42) | 0.75                       |
| Nitrate intake from<br>vegetables<br>(10 mg/day)                 | Model 1 | 0.03 (−0.07–0.13)                                                     | 0.56           | 0.00      | −1.91 (−4.30–0.48)   | −2.70 (−5.01– −0.40) | −1.41 (−3.87–1.05) | −0.89 (−3.15–1.38) | 0.67                       |
|                                                                  | Model 2 | 0.02 (−0.08–0.12)                                                     | 0.69           | 0.00      | −2.01 (−4.41–0.39)   | −2.52 (−4.85– −0.19) | −1.30 (−3.76–1.17) | −1.24 (−3.52–1.04) | 0.83                       |
| Nitrate intake from<br>non-vegetable food sources<br>(10 mg/day) | Model 1 | 0.32 (−1.22–1.85)                                                     | 0.69           | 0.00      | 0.88 (−1.32–3.08)    | 2.19 (−0.11–4.48)    | −0.37 (−2.73–1.99) | 0.64 (−1.87–3.15)  | 0.78                       |
|                                                                  | Model 2 | 0.11 (−1.42–1.63)                                                     | 0.89           | 0.00      | 0.58 (−1.62–2.78)    | 1.86 (−0.43–4.14)    | −0.63 (−2.95–1.71) | 0.23 (−2.24–2.71)  | 0.96                       |

Model 1: adjusted for body mass index, total energy intake, diet quality, physical activity, blood pressure lowering medications and follow-up time. Model 2: model 1 additionally adjusted for education level and smoking status.

<sup>a</sup> Betas (95%CI) for diastolic blood pressure by total dietary nitrate intake, nitrate intake from vegetables, and nitrate intake from non-vegetable food sources (as continuous variables) analyzed using linear regression.

<sup>b</sup> Test for trend conducted using median value for each quintile (total dietary nitrate intake: quintile 1 = 48.8 mg/day; quintile 2 = 69.0 mg/day; quintile 3 = 86.4 mg/day; quintile 4 = 114.0 mg/day; quintile 5 = 213.0 mg/day; nitrate intake from vegetables: quintile 1 = 34.6 mg/day; quintile 2 = 54.2 mg/day; quintile 3 = 72.0 mg/day; quintile 4 = 98.1 mg/day; quintile 5 = 196.8 mg/day; nitrate intake from non-vegetable food sources: quintile 1 = 10.1 mg/day; quintile 2 = 11.9 mg/day; quintile 3 = 14.1 mg/day; quintile 4 = 15.8 mg/day; quintile 5 = 21.1 mg/day).

**Table S2.** Multivariable adjusted beta (95% confidence interval) of systolic blood pressure, by quintiles of nitrate intake.

|                                                                  |         | Beta <sup>a</sup> per 1 unit<br>increase in nitrate<br>intake | P-value | Q1   | Q2                   | Q3                 | Q4                   | Q5                   | P-trend <sup>b</sup> |
|------------------------------------------------------------------|---------|---------------------------------------------------------------|---------|------|----------------------|--------------------|----------------------|----------------------|----------------------|
| Total dietary nitrate intake<br>(10 mg/day)                      | Model 1 | -0.16 (-0.34–0.03)                                            | 0.10    | 0.00 | -4.56 (-8.55– -0.57) | -1.27 (-5.92–3.38) | -5.75 (-9.95– -1.56) | -4.44 (-8.68– -0.20) | 0.06                 |
|                                                                  | Model 2 | -0.13 (-0.32–0.05)                                            | 0.16    | 0.00 | -4.70 (-8.75– -0.66) | -1.35 (-6.10–3.39) | -5.31 (-9.55– -1.07) | -3.89 (-8.22–0.44)   | 0.13                 |
| Nitrate intake from<br>Vegetables<br>(10 mg/day)                 | Model 1 | -0.15 (-0.33–0.04)                                            | 0.11    | 0.00 | -4.30 (-8.40– -0.20) | -4.14 (-8.41–0.12) | -4.85 (-9.22– -0.48) | -4.94 (-9.17– -0.70) | <b>0.04</b>          |
|                                                                  | Model 2 | -0.13 (-0.31–0.06)                                            | 0.18    | 0.00 | -4.55 (-8.69– -0.41) | -4.18 (-8.53–0.18) | -4.63 (-9.04– -0.21) | -4.50 (-8.80– -0.19) | 0.11                 |
| Nitrate intake from<br>non-vegetable food sources<br>(10 mg/day) | Model 1 | -1.62 (-4.41–1.16)                                            | 0.25    | 0.00 | 0.84 (-3.26–4.94)    | 0.84 (-3.43–5.12)  | -1.32 (-5.61–2.98)   | -1.96 (-6.50–2.59)   | 0.15                 |
|                                                                  | Model 2 | -1.79 (-4.56–0.99)                                            | 0.21    | 0.00 | 0.56 (-3.53–4.64)    | 0.75 (-3.51–5.01)  | -1.90 (-6.14–2.35)   | -2.43 (-6.90–2.05)   | 0.11                 |

Model 1: adjusted for body mass index, total energy intake, diet quality, physical activity, blood pressure lowering medications and follow-up time. Model 2: model 1 additionally adjusted for education level and smoking status.

<sup>a</sup> Betas (95%CI) for systolic blood pressure by total dietary nitrate intake, nitrate intake from vegetables, and nitrate intake from non-vegetable food sources (as continuous variables) analyzed using linear regression.

<sup>b</sup> Test for trend conducted using median value for each quintile (total dietary nitrate intake: quintile 1 = 48.8 mg/day; quintile 2 = 69.0 mg/day; quintile 3 = 86.4 mg/day; quintile 4 = 114.0 mg/day; quintile 5 = 213.0 mg/day; nitrate intake from vegetables: quintile 1 = 34.6 mg/day; quintile 2 = 54.2 mg/day; quintile 3 = 72.0 mg/day; quintile 4 = 98.1 mg/day; quintile 5 = 196.8 mg/day; nitrate intake from non-vegetable food sources: quintile 1 = 10.1 mg/day; quintile 2 = 11.9 mg/day; quintile 3 = 14.1 mg/day; quintile 4 = 15.8 mg/day; quintile 5 = 21.1 mg/day).

**Table S3.** Multivariable adjusted odds ratio (95% confidence interval) of hypertension, by quintiles of nitrate intake.

|                                                            |         | <b>OR<sup>a</sup> per 1 unit increase in nitrate intake</b> | <b>P-value</b> | <b>Q1</b> | <b>Q2</b>        | <b>Q3</b>        | <b>Q4</b>        | <b>Q5</b>        | <b>P-trend<sup>b</sup></b> |
|------------------------------------------------------------|---------|-------------------------------------------------------------|----------------|-----------|------------------|------------------|------------------|------------------|----------------------------|
| Total dietary nitrate intake (10 mg/day)                   | Model 1 | 0.98 (0.96–1.00)                                            | 0.12           | 1.00      | 0.67 (0.41–1.09) | 0.88 (0.53–1.45) | 0.57 (0.35–0.94) | 0.75 (0.46–1.23) | 0.41                       |
|                                                            | Model 2 | 0.99 (0.96–1.01)                                            | 0.15           | 1.00      | 0.68 (0.41–1.11) | 0.86 (0.52–1.44) | 0.60 (0.36–0.99) | 0.79 (0.48–1.30) | 0.57                       |
| Nitrate intake from Vegetables (10 mg/day)                 | Model 1 | 0.99 (0.97–1.01)                                            | 0.16           | 1.00      | 0.79 (0.49–1.28) | 0.75 (0.46–1.24) | 0.74 (0.45–1.21) | 0.73 (0.45–1.18) | 0.30                       |
|                                                            | Model 2 | 0.99 (0.97–1.01)                                            | 0.19           | 1.00      | 0.77 (0.47–1.25) | 0.75 (0.45–1.25) | 0.76 (0.46–1.25) | 0.76 (0.46–1.25) | 0.45                       |
| Nitrate intake from non-vegetable food sources (10 mg/day) | Model 1 | 0.65 (0.45–0.94)                                            | <b>0.02</b>    | 1.00      | 1.26 (0.79–2.02) | 1.10 (0.68–1.79) | 0.94 (0.57–1.56) | 0.69 (0.41–1.16) | 0.06                       |
|                                                            | Model 2 | 0.64 (0.45–0.93)                                            | <b>0.02</b>    | 1.00      | 1.22 (0.75–1.97) | 1.07 (0.65–1.76) | 0.93 (0.56–1.55) | 0.67 (0.39–1.14) | 0.05                       |

Model 1: adjusted for body mass index, total energy intake, diet quality, physical activity, blood pressure lowering medications and follow-up time. Model 2: model 1 additionally adjusted for education level and smoking status.

<sup>a</sup> Odds Ratios (95%CI) for hypertension by total dietary nitrate intake, nitrate intake from vegetables, and nitrate intake from non-vegetable food sources (as continuous variables) analyzed using logistic regression.

<sup>b</sup> Test for trend conducted using median value for each quintile (total dietary nitrate intake: quintile 1 = 48.8 mg/day; quintile 2 = 69.0 mg/day; quintile 3 = 86.4 mg/day; quintile 4 = 114.0 mg/day; quintile 5 = 213.0 mg/day; nitrate intake from vegetables: quintile 1 = 34.6 mg/day; quintile 2 = 54.2 mg/day; quintile 3 = 72.0 mg/day; quintile 4 = 98.1 mg/day; quintile 5 = 196.8 mg/day; nitrate intake from non-vegetable food sources: quintile 1 = 10.1 mg/day; quintile 2 = 11.9 mg/day; quintile 3 = 14.1 mg/day; quintile 4 = 15.8 mg/day; quintile 5 = 21.1 mg/day).

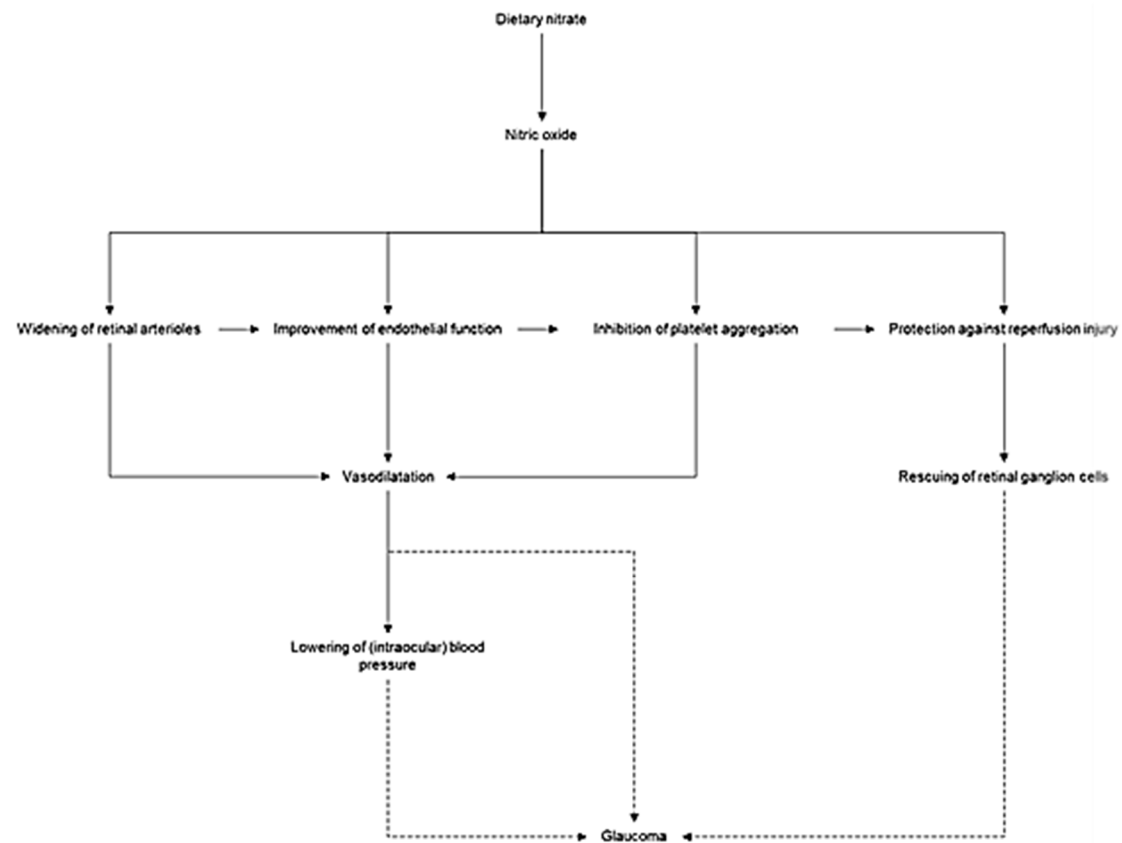

**Figure S2.** Beneficial health effects of dietary nitrate. Beneficial health effects of dietary nitrate, a source of nitric oxide, and their possible association with glaucoma (indicated by the dotted arrows).

**Table S4.** Multivariable adjusted odds ratio (95% confidence interval) of incident open-angle glaucoma by nitrate intake.

|                                                                | OR <sup>c</sup> per 1 unit increase in nitrate intake | P-value |
|----------------------------------------------------------------|-------------------------------------------------------|---------|
| Total dietary nitrate intake (per 10 mg/day)                   |                                                       |         |
| Model 1 <sup>a</sup>                                           | 0.95 (0.91–0.98)                                      | 0.002   |
| Model 1 <sup>b</sup>                                           | 0.96 (0.92–0.99)                                      | 0.03    |
| Vegetable dietary nitrate intake (per 10 mg/day)               |                                                       |         |
| Model 1 <sup>a</sup>                                           | 0.95 (0.91–0.98)                                      | 0.004   |
| Model 1 <sup>b</sup>                                           | 0.96 (0.92–0.99)                                      | 0.03    |
| Nitrate intake from non-vegetable food sources (per 10 mg/day) |                                                       |         |
| Model 1 <sup>a</sup>                                           | 0.63 (0.41–0.96)                                      | 0.03    |
| Model 1 <sup>b</sup>                                           | 0.76 (0.49–1.17)                                      | 0.22    |

<sup>a</sup> Model 1: adjusted for body mass index (BMI), total energy intake, diet quality, physical activity, and follow-up time. Analysis performed in participants matched on age and sex.

<sup>b</sup> Model 1: adjusted for total energy intake, diet quality, physical activity, and follow-up time. Analysis performed in participants matched on age, sex and BMI.

<sup>c</sup> Odds Ratios (95% confidence interval) for open-angle glaucoma by total dietary nitrate intake, nitrate intake from vegetables, and nitrate intake from non-vegetable food sources (as continuous variables) analyzed using conditional logistic regression.

**Table S5.** Multivariable adjusted beta (95% confidence interval) of intraocular pressure by nitrate intake.

|                                                                | Beta <sup>c</sup> per 1 unit increase in nitrate intake | P-value |
|----------------------------------------------------------------|---------------------------------------------------------|---------|
| Total dietary nitrate intake (per 10 mg/day)                   |                                                         |         |
| Model 1 <sup>a</sup>                                           | 0.02 (−0.02–0.06)                                       | 0.35    |
| Model 1 <sup>b</sup>                                           | 0.00 (−0.06–0.05)                                       | 0.89    |
| Vegetable dietary nitrate intake (per 10 mg/day)               |                                                         |         |
| Model 1 <sup>a</sup>                                           | 0.02 (−0.02–0.06)                                       | 0.29    |
| Model 1 <sup>b</sup>                                           | 0.00 (−0.05–0.05)                                       | 0.97    |
| Nitrate intake from non-vegetable food sources (per 10 mg/day) |                                                         |         |
| Model 1 <sup>a</sup>                                           | −0.45 (−0.96–0.06)                                      | 0.09    |
| Model 1 <sup>b</sup>                                           | −0.67 (−1.30– −0.05)                                    | 0.04    |

<sup>a</sup> Model 1: adjusted for body mass index (BMI), total energy intake, diet quality, physical activity, and follow-up time. Analysis performed in participants matched on age and sex.

<sup>b</sup> Model 1: adjusted for total energy intake, diet quality, physical activity, and follow-up time. Analysis performed in participants matched on age, sex and BMI.

<sup>c</sup> Betas (95% confidence interval) for intraocular pressure by total dietary nitrate intake, nitrate intake from vegetables, and nitrate intake from non-vegetable food sources (as continuous variables) analyzed using linear regression.
